# Supplementary material for: Natriuretic Peptide Receptor B modulates the proliferation of the cardiac cells expressing the Stem Cell Antigen-1
Source: PubMed Central journal article supplement (PMC5299447; doi:10.1038/srep41936), 2017-02-09
Supplement: srep41936-s1.pdf [file srep41936-s1.pdf]

**Natriuretic Peptide Receptor B modulates the proliferation of the cardiac cells  
expressing the Stem Cell Antigen-1.**

Stéphanie Rignault-Clerc,<sup>1</sup> Christelle Biemann,<sup>1</sup> Lucas Liaudet,<sup>2</sup> Bernard Waeber <sup>1</sup>  
François Feihl ,<sup>1</sup> Nathalie Rosenblatt-Velin <sup>1\*</sup>

<sup>1</sup> Unité de Physiopathologie Clinique and <sup>2</sup> Service de Médecine Intensive Adulte,  
Centre Hospitalier Universitaire Vaudois and University of Lausanne, Switzerland.

\* Corresponding author

## **SUPPLEMENTAL METHODS**

### **Cell isolation and proliferation**

Neonatal mice were sacrificed by decapitation with surgical scissors and the hearts removed. Hearts (1-2 days-old) were enzymatically digested with 0.45 mg/ml collagenase II (Worthington, Biochemical Corporation, USA) and 1 mg/ml pancreatin (Sigma-Aldrich). Cardiomyocytes were separated from the non-myocyte cells (NMCs) by two differential plating. NMCs were first cultured **in the proliferation medium**: a 3:1 mixture of DMEM and Medium 199 (Invitrogen Corp, San Diego, CA, USA) supplemented with 10% horse serum (Oxoid), 5% fetal bovine serum (FBS) (Invitrogen), 10 mM Hepes, 100 U/ml penicillin G, and 100 microg/ml streptomycin.

### **Western blot**

Total proteins were extracted from sorted Sca-1<sup>+</sup> cells after lysis in a buffer containing Nonidet P-40 0.5%, NaCl 150 mM, Na-orthovanadate 1 mM, NaF 10 mM, Tris-HCL pH=7.5 10 mM, PMSF 1 mM, EDTA pH=8 1 mM, aprotinin 10 µg/ml, leupeptin 10 µg/ml, pepstatin 1 µg/ml. 30 µg of these total proteins were separated by SDS-PAGE, transferred to nitrocellulose membranes (Biorad), and blocked for 1h at room temperature in Odyssey blocking buffer (1/2 in TBS Li-COR Biosciences).

### **Neonatal and infarcted mice treated with BNP**

BNP (1 microg/mouse), CNP (1 microg/mouse), or NaCl was injected intraperitoneally (ip) into 3-4 days old C57BL/6 mice (American Peptide Co, Sunnyvale, CA, US) every 2 days during 2 weeks as previously described <sup>1</sup>. Mice were sacrificed 3 days after the

last injection using ip lethal injection of pentobarbital (150 mg/kg). The breathing arrest was controlled and cervical dislocation was performed.

In adult mice, the left anterior descending coronary artery (LAD) was occluded in 10 weeks-old C57 BL/6 mice to induce MI. Mice were anesthetized by ip injection of ketamine/xylazine/acepromazine (65 mg/kg; 15 mg/kg; 2 mg/kg). Mice were moved to a heated platform. During surgery, the depth of mouse anesthesia was tested by gentle pinch the legs. Directly after the surgery, NaCl or BNP (1 microg/20g in 20 microl) was injected into the myocardium and thereafter BNP (2 microg/mouse) was injected ip every 2 days. After surgery, temgesic (0.1 mg/kg) was injected subcutaneously to reduce the pain, and injections were performed twice per day for up to 4 days. Mice were sacrificed 10 days after MI induction by lethal injection of pentobarbital (150 mg/kg intraperitoneally). The breathing arrest was controlled and cervical dislocation was performed.

## REFERENCE

1. Biemann, C. *et al.* Brain natriuretic peptide is able to stimulate cardiac progenitor cell proliferation and differentiation in murine hearts after birth. *Basic Res Cardiol* **110**, 455-72 (2015).

**Supplemental Table S1.** Flow cytometric characterization of Non-Myocyte Cells (NMCs) isolated directly from murine hearts or after cell culture.

| Age of mice | strain               | n | days after isolation | NPR-A <sup>+</sup> | NPR-B <sup>+</sup> | c-kit <sup>+</sup> | Sca-1 <sup>+</sup> | NPR-A <sup>+</sup><br>/c-kit <sup>+</sup> | NPR-A <sup>+</sup><br>/Sca-1 <sup>+</sup> | NPR-B <sup>+</sup><br>/c-kit <sup>+</sup> | NPR-B <sup>+</sup><br>/Sca-1 <sup>+</sup> |
|-------------|----------------------|---|----------------------|--------------------|--------------------|--------------------|--------------------|-------------------------------------------|-------------------------------------------|-------------------------------------------|-------------------------------------------|
| Adult       | WT                   | 6 | 0                    | 3.3±1.0            | 6.3±1.1            | 6.2±1.1            | 50.7±2.7           | 2.1±0.7                                   | 1.8±0.2                                   | 3.5±0.7                                   | 3.7±0.8                                   |
| Neonatal    | WT                   | 6 | 0                    | 2.9±0.3            | 5.6±1.1            | 2.9±0.3            | 15.3±1.6           | 2.9±0.3                                   | 2.0±0.6                                   | 2.7±0.4                                   | 4.1±1.4                                   |
| Neonatal    | WT                   | 5 | 3°                   | 3.8±0.5*           | 2.6±1.0*           | 2.3±0.9            | 49.0±4.2*          | 0.6±0.2*                                  | 3.3±0.4                                   | 0.6±0.2*                                  | 2.1±0.9                                   |
| Neonatal    | NPR-A <sup>-/-</sup> | 3 | 3                    | --                 | 1.9±0.2            | 0.7±0.2            | 64.2±9             | --                                        | --                                        | 0.4±0.1                                   | 1.9±0.5                                   |
| Neonatal    | NPR-B <sup>-/-</sup> | 6 | 3                    | 2.9±0.7            | --                 | 1.3±0.5            | 52.2±5.6           | 0.9±0.2                                   | 2.3±0.5                                   | --                                        | --                                        |

Data represent the percentage of cells positive for the different markers and are expressed as the mean ± SEM of the indicated number of experiments (n). Neonatal and adult non-myocyte cells (NMCs) were analysed directly after isolation (0 days after isolation) or ° 3 days after the first passage at confluence, at the onset of BNP treatment. Cells expressing NPR-A and NPR-B (C57BL/6 or WT cells) were compared to cells expressing either only NPR-B (NPR-A KO mice) or only NPR-A (NPR-B deficient mice). \* p<0.05 between WT cells after isolation and after 3 days after the first passage.

**Supplemental Table S2.** Antibodies used in flow cytometry analysis, cell sorting, immunohistology and Western blot analysis.

### Flow Cytometry analysis and Cell sorting

|                               |        |                          |
|-------------------------------|--------|--------------------------|
| rat-anti Sca-1 PE-Cy5 or FITC | 1/50   | eBiosciences             |
| rat anti-c-kit PE-Cy5 or FITC | 1/50   | eBiosciences             |
| rat anti-CD31 APC             | 1/100  | eBiosciences             |
| rat anti-PDGFR- $\alpha$ PE   | 1/80   | eBiosciences             |
| rabbit anti-NPR-A             | 1/50   | Abcam                    |
| + donkey anti-rabbit FITC     | 1/1000 | Molecular Probes         |
| goat anti-NPR-B               | 1/20   | Santa Cruz Biotechnology |
| + chicken anti-goat FITC      | 1/500  | Molecular Probes         |

### Immunohistology

#### Primary antibodies

|                                 |        |                          |
|---------------------------------|--------|--------------------------|
| rabbit anti-NPR-A               | 1/50   | Abcam                    |
| goat anti-NPR-B                 | 1/50   | Santa Cruz Biotechnology |
| goat anti-Nkx2.5                | 1/20   | Santa Cruz Biotechnology |
| rabbit anti-Nkx2.5              | 1/100  | Abcam                    |
| goat anti-Troponin I            | 1/100  | Santa Cruz Biotechnology |
| rat anti-Sca-1                  | 1/1000 | Abcam                    |
| rabbit anti-PCNA                | 1/100  | Abcam                    |
| rat anti-CD31 biotin            | 1/200  | Becton Dickinson         |
| rabbit anti-von                 | 1/500  | Dako                     |
| Willbrand Factor                |        |                          |
| Rabbit anti-smooth muscle actin | 1/200  | Abcam                    |

#### Secondary antibodies

|                              |        |                  |
|------------------------------|--------|------------------|
| horse anti-goat biotin       | 1/200  | Vector           |
| horse anti-rabbit biotin     | 1/200  | Vector           |
| donkey anti-rabbit Alexa 594 | 1/500  | Molecular Probes |
| donkey anti-goat Alexa 594   | 1/1000 |                  |
| donkey anti-rat Alexa 488    | 1/1000 |                  |
| goat anti-rabbit Alexa 594   | 1/2000 |                  |
| donkey anti-rabbit Alexa 488 | 1/1000 |                  |
| Streptavidine Alexa 594      | 1/1000 |                  |
| Streptavidine Alexa 647      | 1/1000 |                  |
| chicken anti-goat Alexa 488  | 1/1000 |                  |

### Western blot analysis

#### Primary antibodies

|                                   |          |                |
|-----------------------------------|----------|----------------|
| rabbit anti-phospho-phospholamban | 1/1000   | Millipore      |
| mouse anti-phospholamban          | 1/500    | Millipore      |
| rabbit anti-p38                   | 1/1000   | Cell Signaling |
| rabbit anti-phospho p38           | 1/500    | Cell Signaling |
| Mouse anti-tubulin                | 1/20 000 | Sigma          |

#### Secondary antibodies

|                            |                                 |                          |
|----------------------------|---------------------------------|--------------------------|
| goat anti-rabbit Alexa 680 | 1/5000                          | Molecular Probes         |
| Anti-mouse IRDye 800       | 1/5000 or 1/20000 (for tubulin) | Rockland Immunochemicals |

**Supplemental Table S3:** Sequences of primers used in quantitative RT-PCR.

| Gene                                  | Sense                     | Anti-sense                | Product size (bp) |
|---------------------------------------|---------------------------|---------------------------|-------------------|
| <b>Brachyury</b>                      | CCTCCCTTGTTGCCTTAGAGTAGTT | GCAGATTGTCTTTGGCTACTTTGTC | 185               |
| <b>CD90</b>                           | TGGGTGCAGCAACTGGAGGC      | CTCGGGACACCTGCAAGACTGA    | 181               |
| <b>CD31</b>                           | GCCTCACCAAGAGAACGGAAGGC   | CTGCTTTCGGTGGGGACAGGC     | 158               |
| <b>c-kit</b>                          | ATCTGCTCTGCGTCCTGTTG      | CTGATTGTGCTGGATGGATG      | 108               |
| <b>Collagen 1<math>\alpha</math>1</b> | AATGGCACGGCTGTGTGCGA      | AACGGGTCCCCTTGGGCCTT      | 183               |
| <b>Collagen 1<math>\alpha</math>2</b> | GGCCCCCTGGTATGACTGGCT     | CGCCACGGGGACCACGAATC      | 129               |
| <b>DDR2</b>                           | TTCCCTGCCAGCGAGTCCA       | ACCACTGCACCCTGACTCCTCC    | 181               |
| <b>eNOS</b>                           | GGCTGTGGTAGTTAGGGCATC     | AGGTTTGGGTTGGGCATCT       | 165               |
| <b>Gata-4</b>                         | CTGTCATCTCACTATGGGCA      | CCAAGTCCGAGCAGGAATTT      | 259               |
| <b>Hand2</b>                          | CCTTCAAGGCGGAGATCAAGA     | CCTGTCCGGCCTTTGGTTTT      | 118               |
| <b>Islet-1</b>                        | GCCTCAGTCCCAGAGTCATC      | AGAGCCTGGTCCTCCTTCTG      | 308               |
| <b>Mlc-2v</b>                         | GACCCAGATCCAGGAGTTCA      | AATTGGACCTGGAGCCTCTT      | 163               |
| <b>Nanog</b>                          | CACCCACCCATGCTAGTCTT      | ACCCTCAAACCTCCTGGTCCT     | 152               |
| <b>Nkx2.5</b>                         | CAAGTGCTCTCCTGCTTTCC      | GTCCAGCTCCACTGCCTTCT      | 130               |
| <b>NPR-A</b>                          | CCAATTATGGCTCCCTGCTA      | CGGTACAAGCTCCCACAAAT      | 198               |
| <b>NPR-B</b>                          | TCATGACAGCCCATGGGAAA      | GGTGACAATGCAGATGTTGG      | 209               |
| <b>Oct-4</b>                          | GGATGCTGTGAGCCAAGG        | GAACAAAATGATGAGTGACAGACAG | 175               |
| <b>PDGFR<math>\alpha</math></b>       | GGGAAGGACTGGAAGCTTGGGGC   | AGATGAGGCCCGGCCCTGTGAGG   | 154               |
| <b>Sca-1</b>                          | TTTGAGACTTCTTGCCCATC      | ACCCAGGATCTCCATACTTTC     | 159               |
| <b>Sox2</b>                           | AAGGGTTCTTGCTGGGTTTT      | AGACCACGAAAACGGTCTTG      | 150               |
| <b>Tbx5</b>                           | GGAAAGATGAGGAATGTTCCAG    | GTGTTACAGCTGATGTCCTCCA    | 223               |
| <b>Tbx20</b>                          | CCCCGCTGCCAGCCAGGCTCTA    | GTGCACCCGTGGCTGGTACTTATGC | 167               |
| <b>Tcf21</b>                          | GGCCAACGACAAGTACGAGA      | GCTGTAGTTCCACACAAGCG      | 129               |
| <b>Troponin T</b>                     | GCGGAAGAGTGGGAAGAGACA     | CCACAGCTCCTTGGCCTTCT      | 127               |
| <b>Vimentin</b>                       | GCCGAAAGCACCCCTGCAGTCA    | GCCTGCAGCTCCTGGATCTCTTCA  | 146               |
| <b>vWF</b>                            | GATGCCCCAGTCAGCTCTAC      | TCAGCCTCGGACAACATAGA      | 131               |
| <b>Wnt1</b>                           | CACGGCACAGGGTATGAGAG      | GTTGGGGCCACTCCAGATAC      | 128               |

|                                |                          |                        |     |
|--------------------------------|--------------------------|------------------------|-----|
| <b><math>\alpha</math>-MHC</b> | AACCAGAGTTTGAGTGACAGAATG | ACTCCGTGCGGATGTCAA     | 130 |
| <b><math>\beta</math>-MHC</b>  | ATGAGACGGTGGTGGGTTT      | CTTTCTTGCCTTGCCTTTG    | 117 |
| <b>18S</b>                     | ACTTTTGGGGCCTTCGTGTC     | GCCCAGAGACTCATTCTTCTTG | 96  |

**A**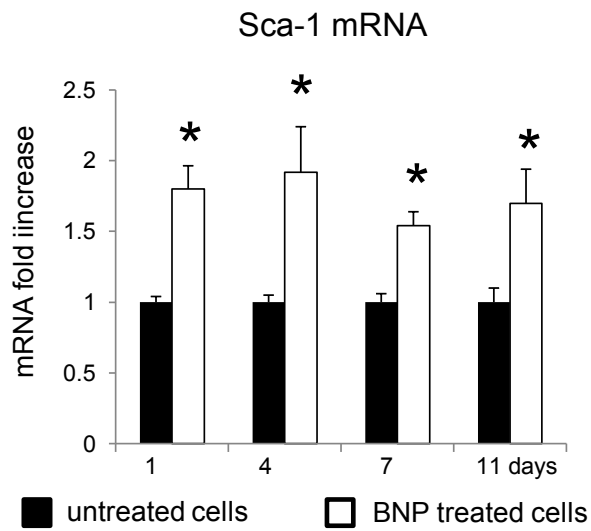**B**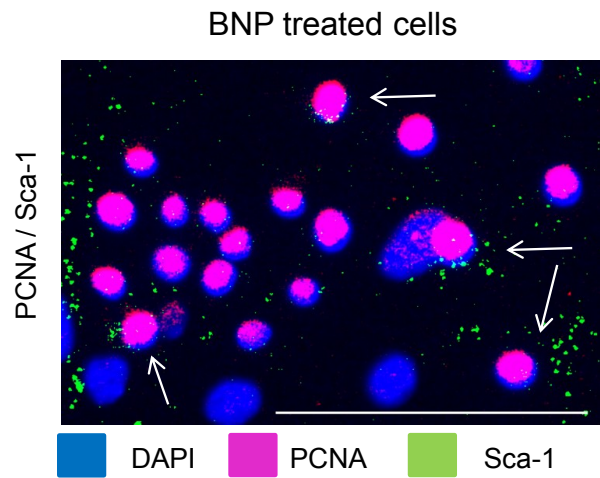

**Supplemental Figure 1. BNP induces Sca-1<sup>+</sup> cell proliferation.** **A.** Quantitative relative expression of mRNA coding for Sca-1 in untreated and BNP treated cells. n= at least 7 different experiments per group. **B.** Representative immunostaining of cells cultured 4 days with BNP and stained with antibodies against the Proliferating Cell Nuclear Antigen (PCNA) (pink), Sca-1 (green) and DAPI (blue). White arrows highlight proliferating Sca-1<sup>+</sup> cells. Scale bar represents 100  $\mu$ m.



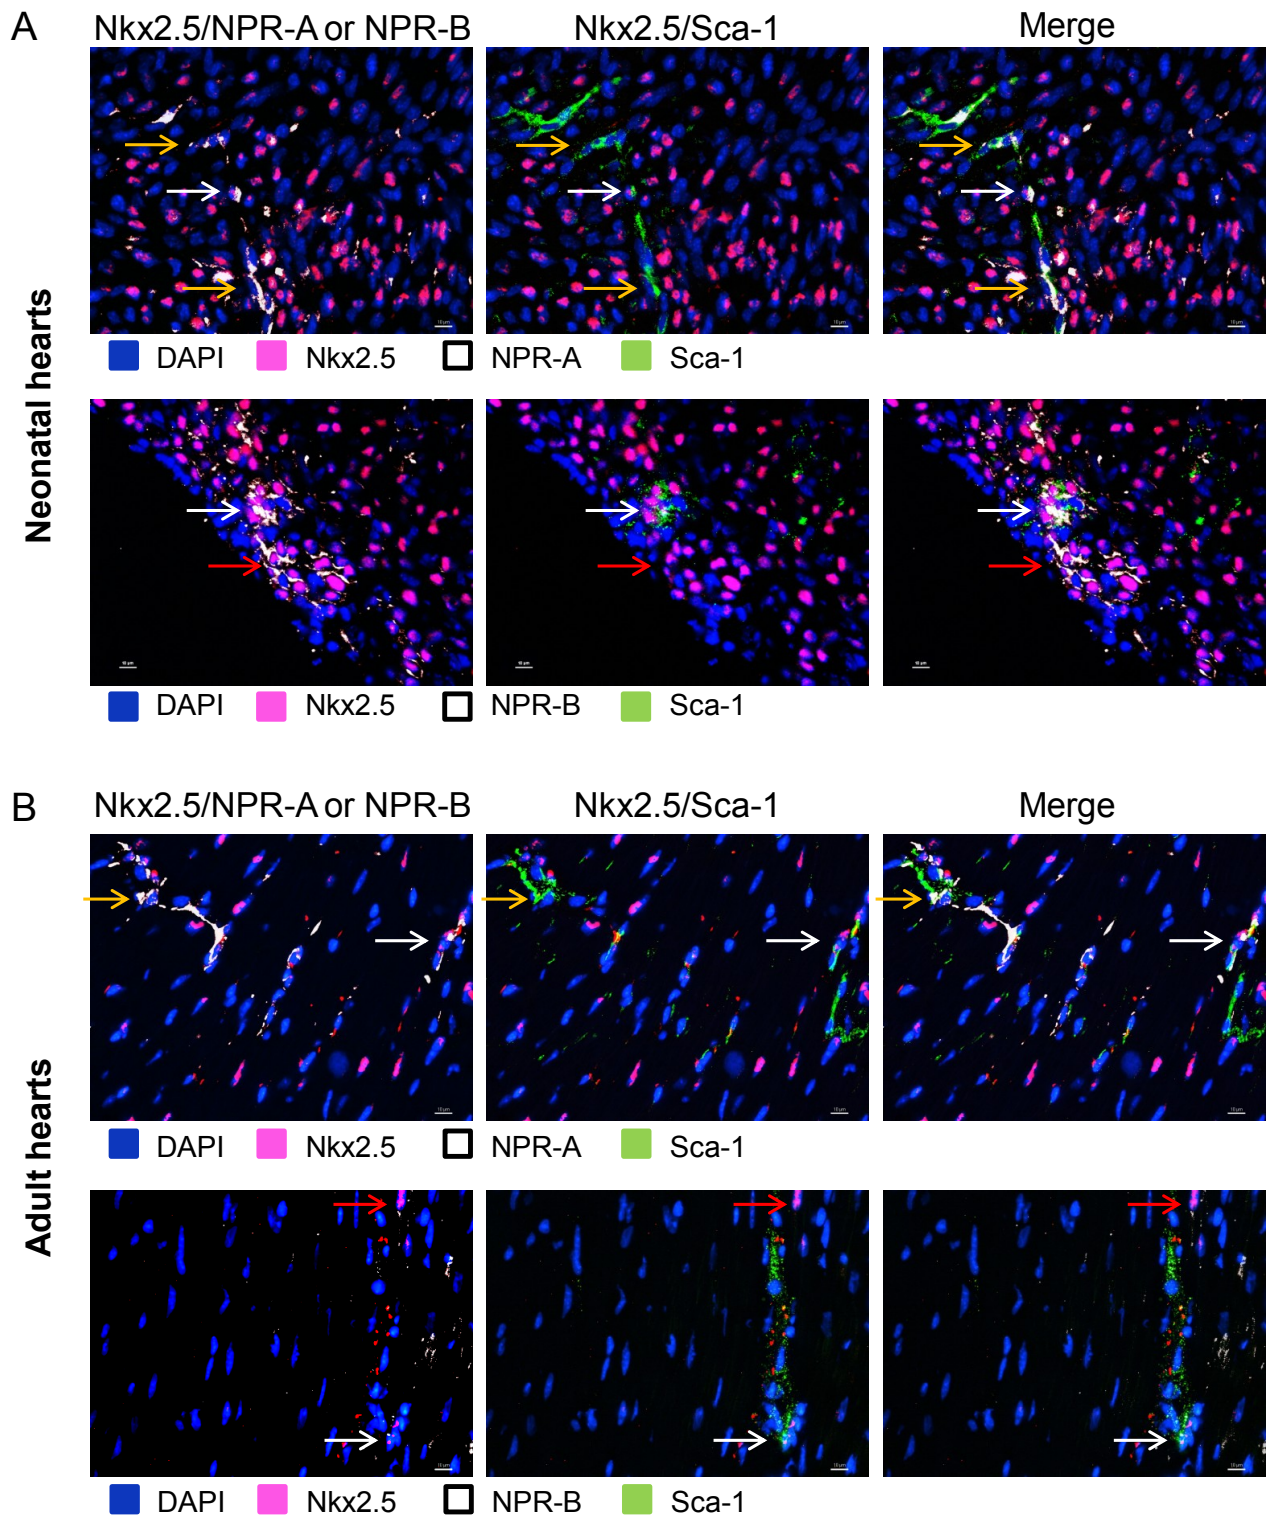

**Supplemental Figure 2. NPR-A and NPR-B receptors are expressed on Nkx2.5<sup>+</sup> Sca-1<sup>+</sup> cells in neonatal and adult hearts.** Immunostainings of neonatal (A) and adult murine hearts (B). Scale bars represented 10  $\mu$ m. The yellow arrows point to Sca-1<sup>+</sup> Nkx2.5<sup>-</sup> cells expressing NPR-A or NPR-B, the white arrows point to Nkx2.5<sup>+</sup> Sca-1<sup>+</sup> cells and the red arrows point to Sca-1<sup>-</sup> cells expressing Nkx2.5 and NPR-B.

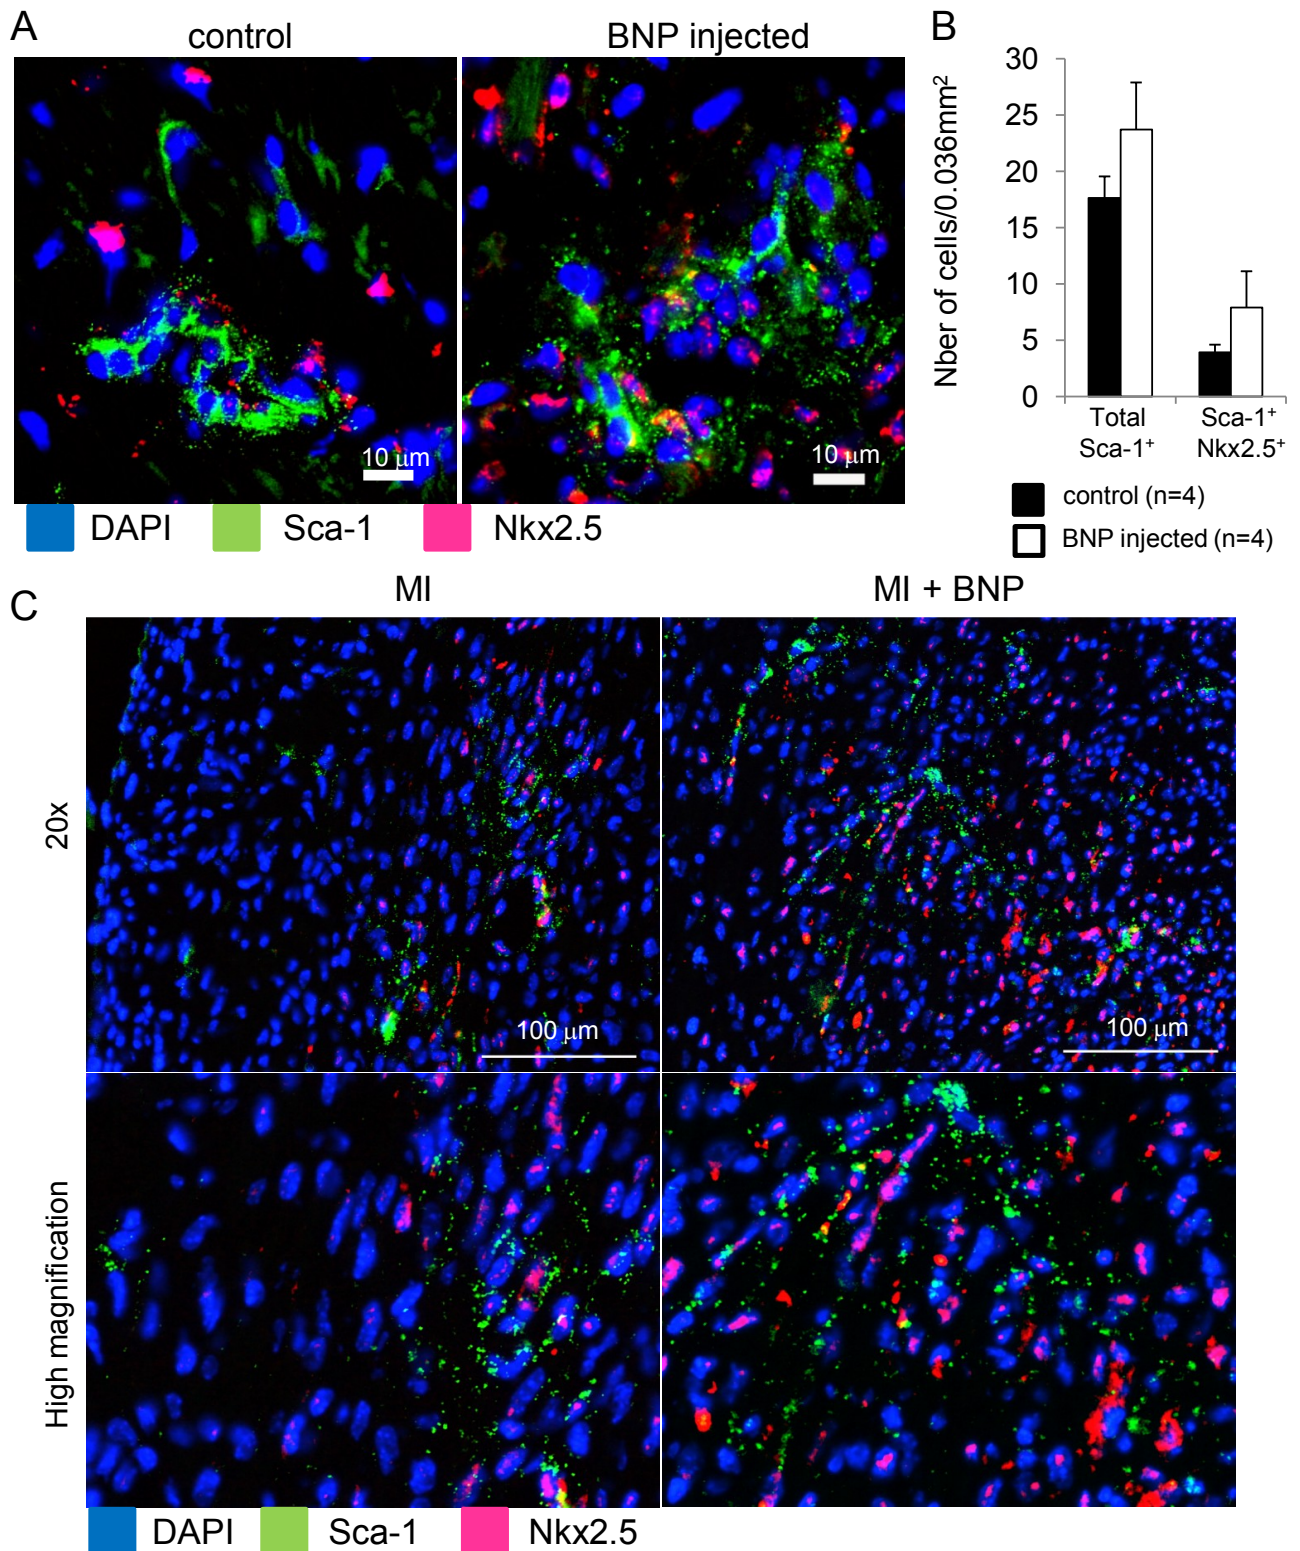

**Supplemental Figure 3. BNP treatment in neonatal and infarcted hearts leads to increased number of Sca-1<sup>+</sup> Nkx2.5<sup>+</sup> cells.** **A.** Heart sections from control or BNP injected neonatal mice. **B.** Quantification of the number of Sca-1<sup>+</sup> cells expressing Nkx2.5 in the hearts of control or BNP injected mice. Data were obtained from at least 6 different pictures per mouse,  $n = 4$  mice per group. Each section covered an area of 0.036 mm<sup>2</sup>. Data are means  $\pm$  SEM. **C.** Heart sections, from infarcted mice injected or not with BNP. Representative pictures of x 20 and high magnification of the infarcted area of the infarcted hearts 10 days after myocardial infarction (MI).

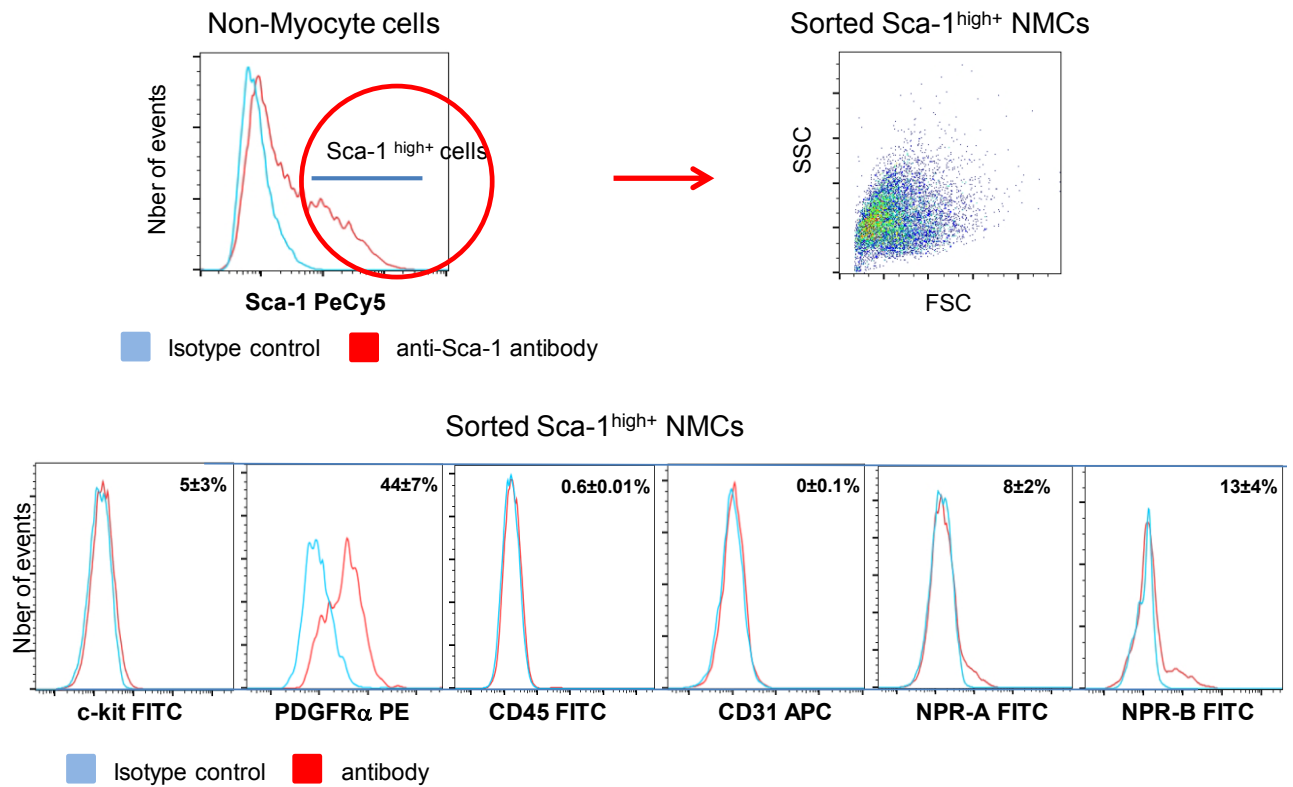

**Supplemental Figure 4. Phenotypic characterisation of the sorted Sca-1<sup>high+</sup> cells.** Representative histograms and dot plot (right) of non myocyte cell (NMC) sorting for high Sca-1 expression. The histograms allow to characterize the Sca-1<sup>high+</sup> cells for the expression of c-kit, PDGFR $\alpha$ , CD45, CD31 and NPR-A and NPR-B proteins. The numbers represent the percentage of the positive cells compared to the total number of Sca-1<sup>high+</sup> cells and are the means  $\pm$  SEM of 3-11 different experiments.

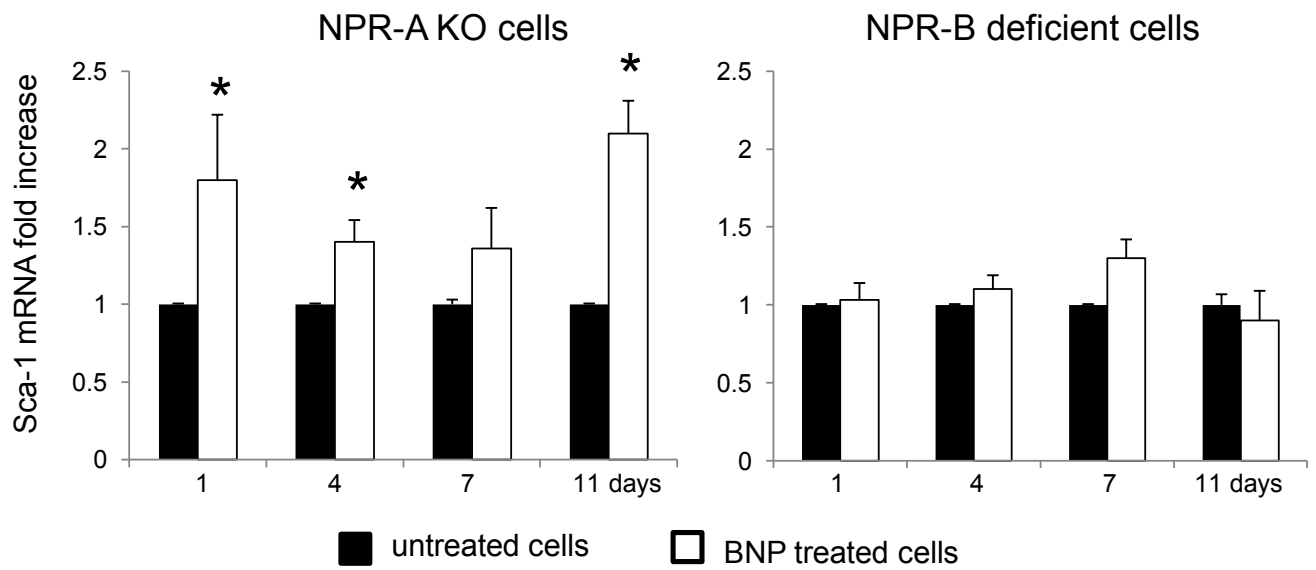

**Supplemental Figure 5. BNP induced increased Sca-1 mRNA expression only in presence of NPR-B receptor.** Quantitative relative expression of mRNA coding for Sca-1 in untreated and BNP treated NPR-A and NPR-B deficient NMCs (n= at least 6 different experiments at different time point). All the results are means  $\pm$  SEM, \*  $p < 0.05$  versus untreated cells.

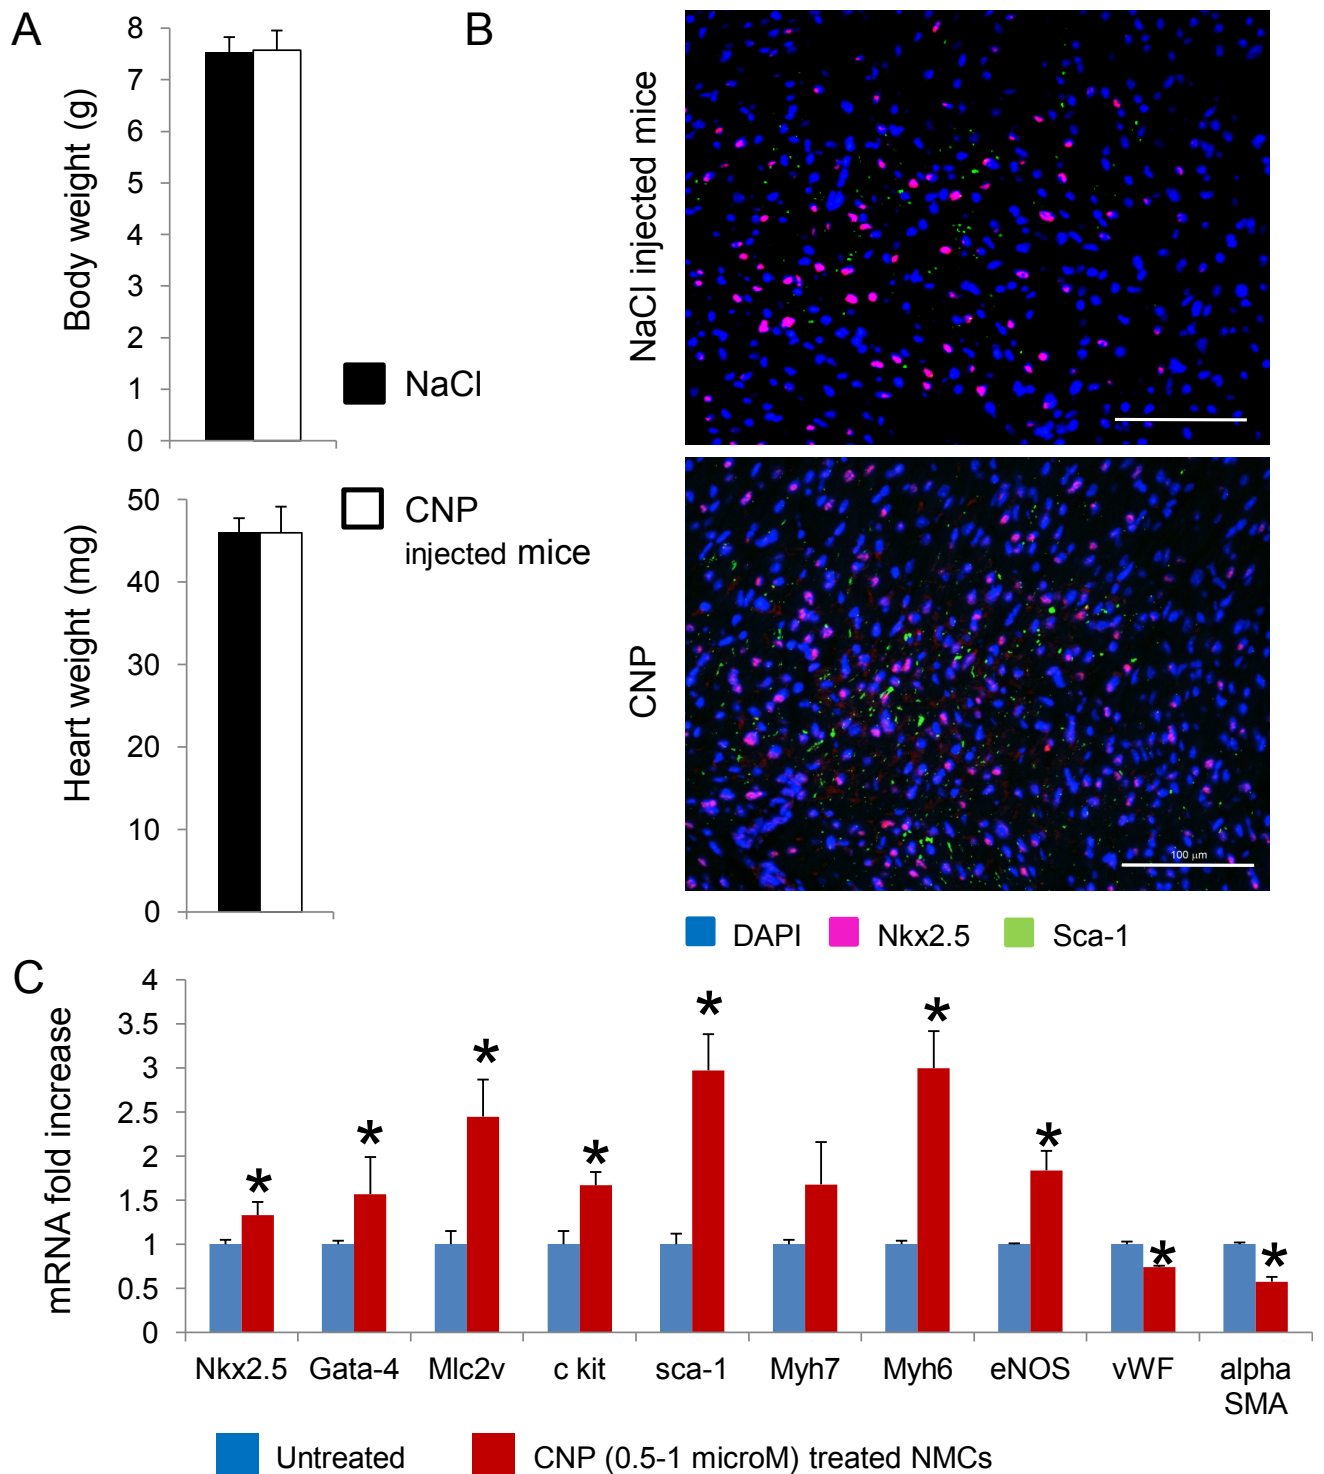

**Supplementary Figure 6. CNP effect on cardiac Non Myocyte Cells *in vivo* and *in vitro*.**

**A-B.** Newborn mice (4 days old) were injected with CNP intraperitoneally every 2 days for up to 2 weeks. Mice were sacrificed 2 days after the last injection. CNP treatment had no effect on body or heart weights. However the numbers of Sca-1<sup>+</sup> cells and of Sca-1<sup>+</sup> Nkx2.5<sup>+</sup> cells was increased (**B**). n=4 mice per group **C.** Non Myocyte cells were isolated from neonatal hearts and treated with CNP in differentiation medium for up to 3 weeks. In presence of CNP, NMCs upregulated cardiomyocyte specific genes (Nkx2.5, Gata-4, Mlc-2v, Myh6). n= 9 different experiments and \* p< 0.05. vWF: von Willbrand Factor, SMA : smooth muscle actin.

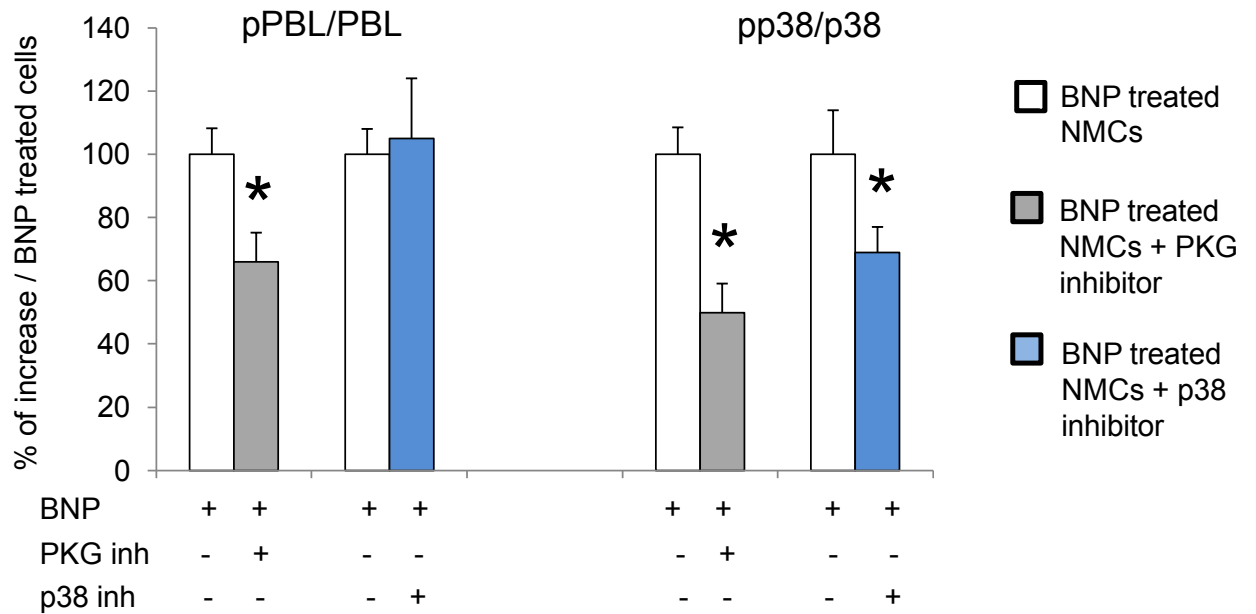

**Supplemental Figure 7. BNP induced PKG activation, which is necessary for at least a part of p38 MAPK phosphorylation.** NMCs were treated 15-30 min with BNP and with a PKG inhibitor or a p38 inhibitor. n= at least 6 different experiments per group. The data were related to the average of BNP treated NMCs. All the results are means  $\pm$  SEM, \*  $p < 0.05$  versus BNP treated cells.

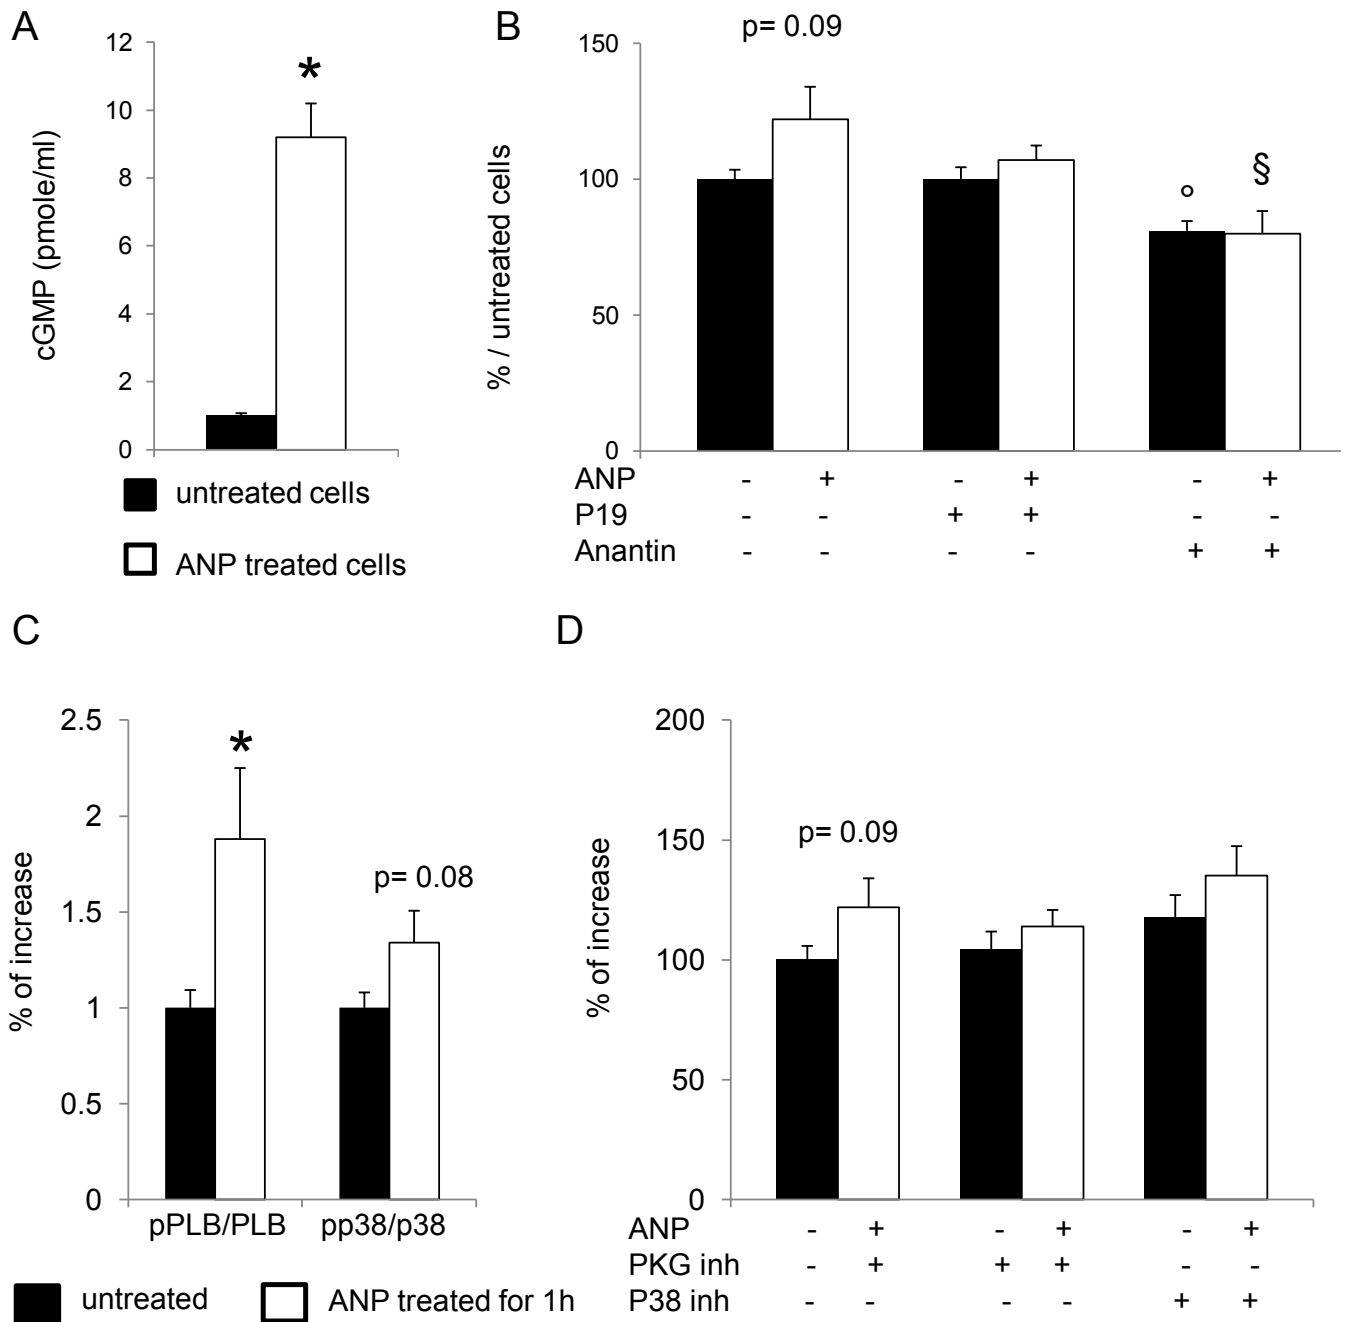

**Supplemental Figure 8. ANP has a moderated effect on Sca-1<sup>+</sup> cell proliferation.** **A.** cGMP levels were measured in the non myocyte cell supernatants (n=4-7) 1h after ANP treatment (1 $\mu$ M). **B.** Sorted Sca-1<sup>high+</sup> cells isolated from wild type hearts were cultured with ANP in presence or not of NPR-B receptor antagonist (P19, 0.5-1 microM) and of an ANF antagonist (Anantin, 0.2 microM). The number of cells was counted after 9-11 days of culture and the results were related to untreated cells. **B.** Quantification of the data from western blot analysis expressed relatively to the average of untreated cells. Sorted Sca-1<sup>high+</sup> cells were or not treated 1h with ANP. **C.** Number of sorted Sca-1<sup>high+</sup> cells after 11 days of culture with or without ANP and PKG or p38 inhibitor. The data were related to the average of untreated cells. **A-C:** n= at least 4 different experiments, All the results are means  $\pm$  SEM, \* p<0.05 versus untreated cells, <sup>o</sup> p< 0.05 versus the untreated cells without inhibitors, <sup>§</sup> p< 0.05 versus the ANP treated cells without inhibitors.
